# Supplementary material for: Social Contact Networks and Disease Eradicability under Voluntary Vaccination
Source: PubMed Central journal article supplement (PMC2625434; doi:10.1371/journal.pcbi.1000280), 2009-02-06

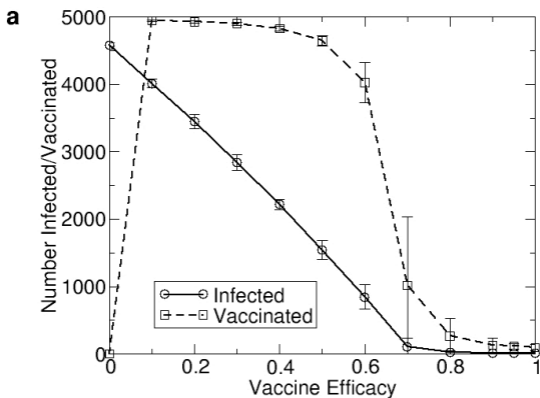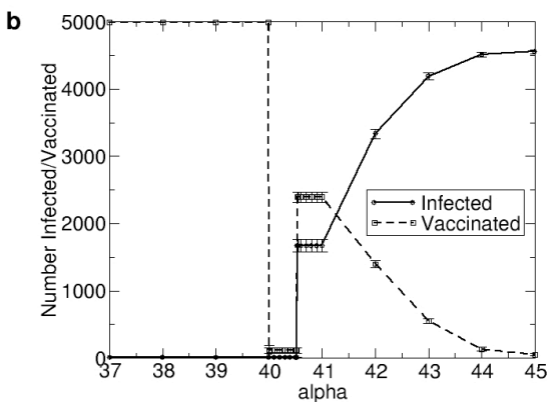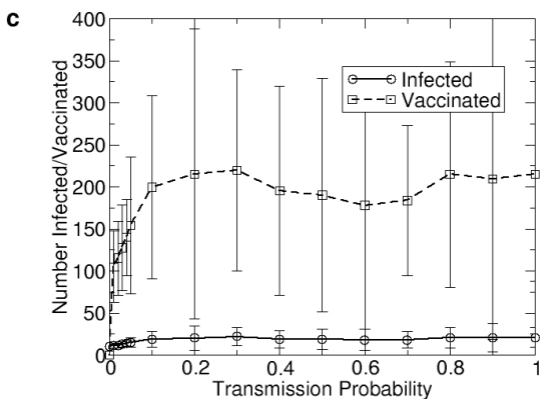

Supplement: pcbi.1000280.s002.pdf [file pcbi.1000280.s002.pdf]
